# Supplementary material for: Synthesis, aqueous solution behavior and self-assembly of a dual pH/thermo-responsive fluorinated diblock terpolymer
Source: Royal Society of Chemistry journal article supplement (doi:10.1039/d0py01515f), 2020-11-23
Supplement: d0py01515f1.pdf [file d0py01515f1.pdf]

## Supporting information

# Synthesis, aqueous solution behavior and self-assembly of a dual pH/thermo-responsive fluorinated diblock terpolymer

Panagiotis G. Falireas,\* Vincent Ladmiral, and Bruno Ameduri\*

Ingénierie et Architectures Macromoléculaires, Institut Charles Gerhardt, Ecole Nationale Supérieure de Chimie de Montpellier (UMR5253-CNRS), UM, 240 rue Emile Jeanbrau, 34296 Montpellier Cedex 5, France.

\*Corresponding Authors: E-mail: [bruno.ameduri@enscm.fr](mailto:bruno.ameduri@enscm.fr) (B. Améduri)

E-mail: [pfalireas@uliege.be](mailto:pfalireas@uliege.be) (P.Falireas)

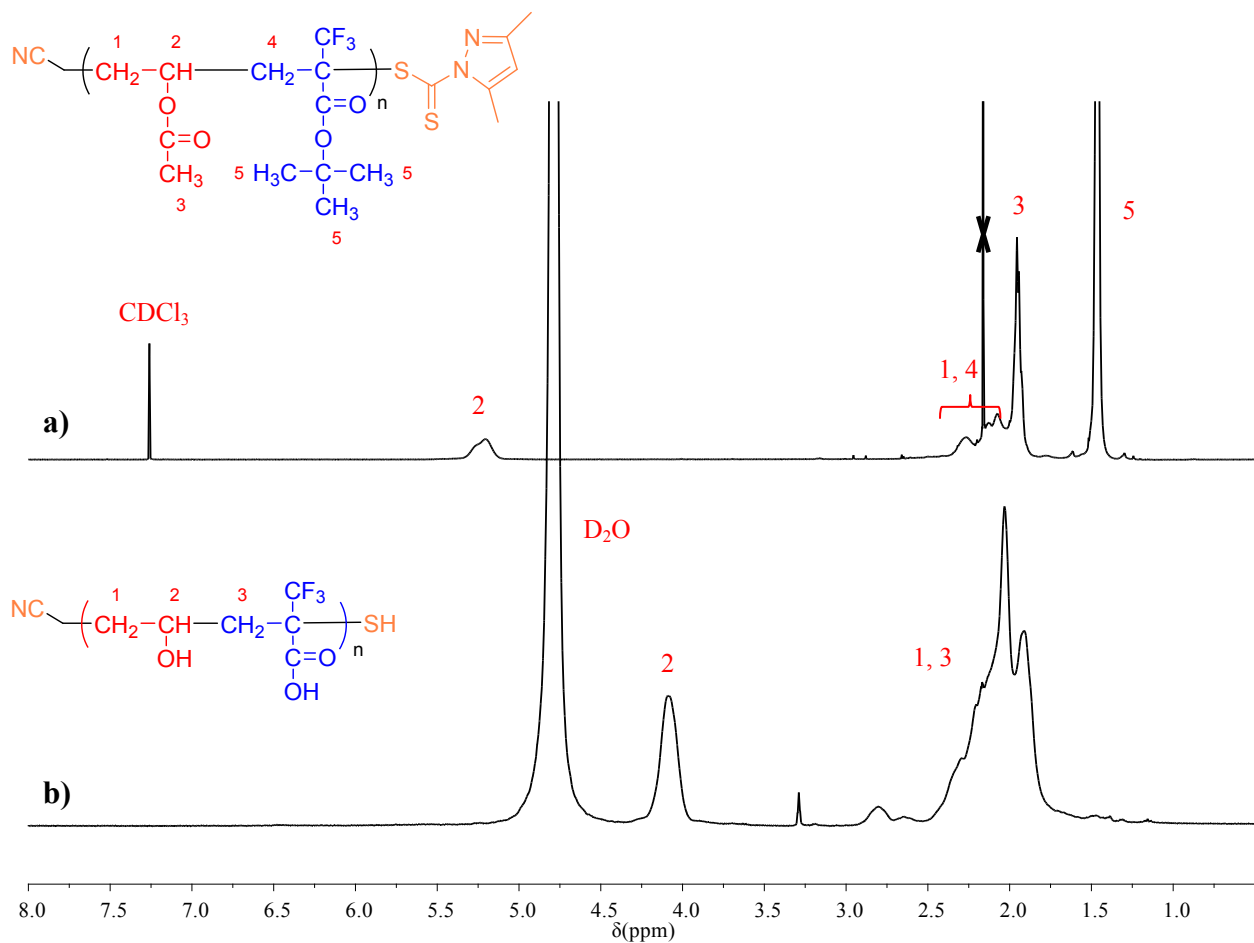

**Figure S1.**  $^1\text{H}$  NMR spectra of P(VAc-*alt*-MAF-TBE) (a) and P(VOH-*alt*-MAF) (b) copolymers recorded in  $\text{CDCl}_3$  and  $\text{D}_2\text{O}$ , respectively. The crossed-out signals are those of acetone (2.16 ppm).

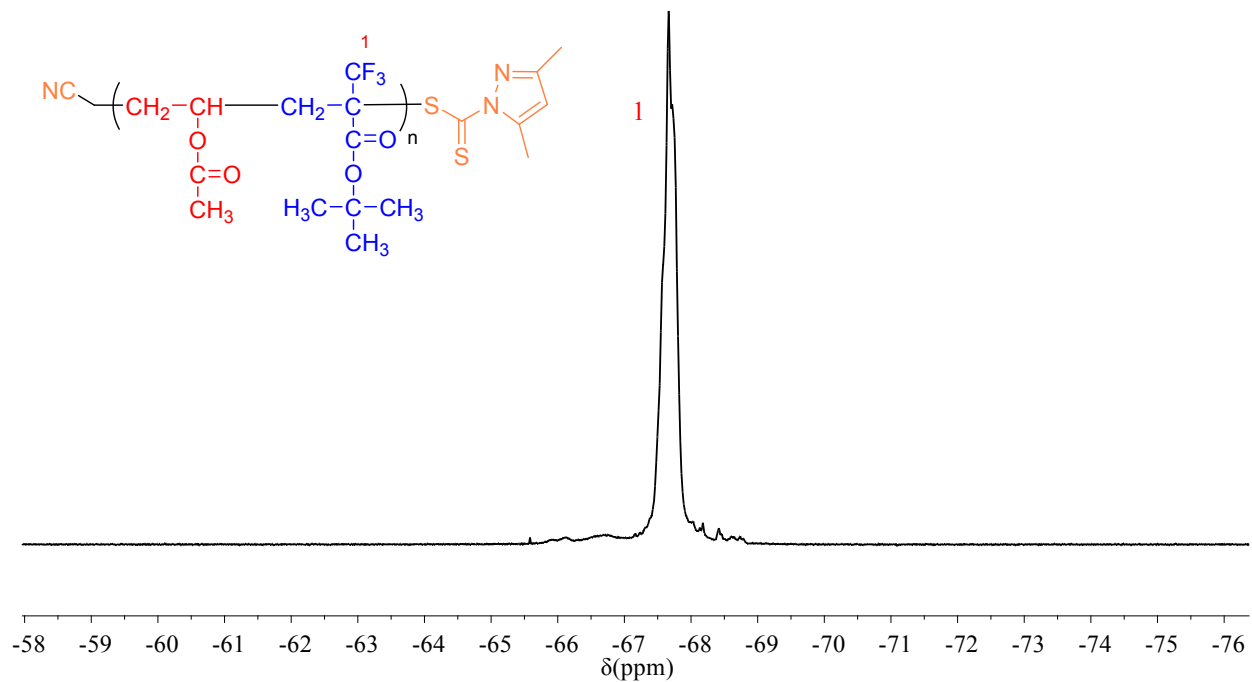

**Figure S2.**  $^{19}\text{F}$  NMR spectrum ( $\text{CDCl}_3$ ) of P(VAc-*alt*-MAF-TBE) copolymer.

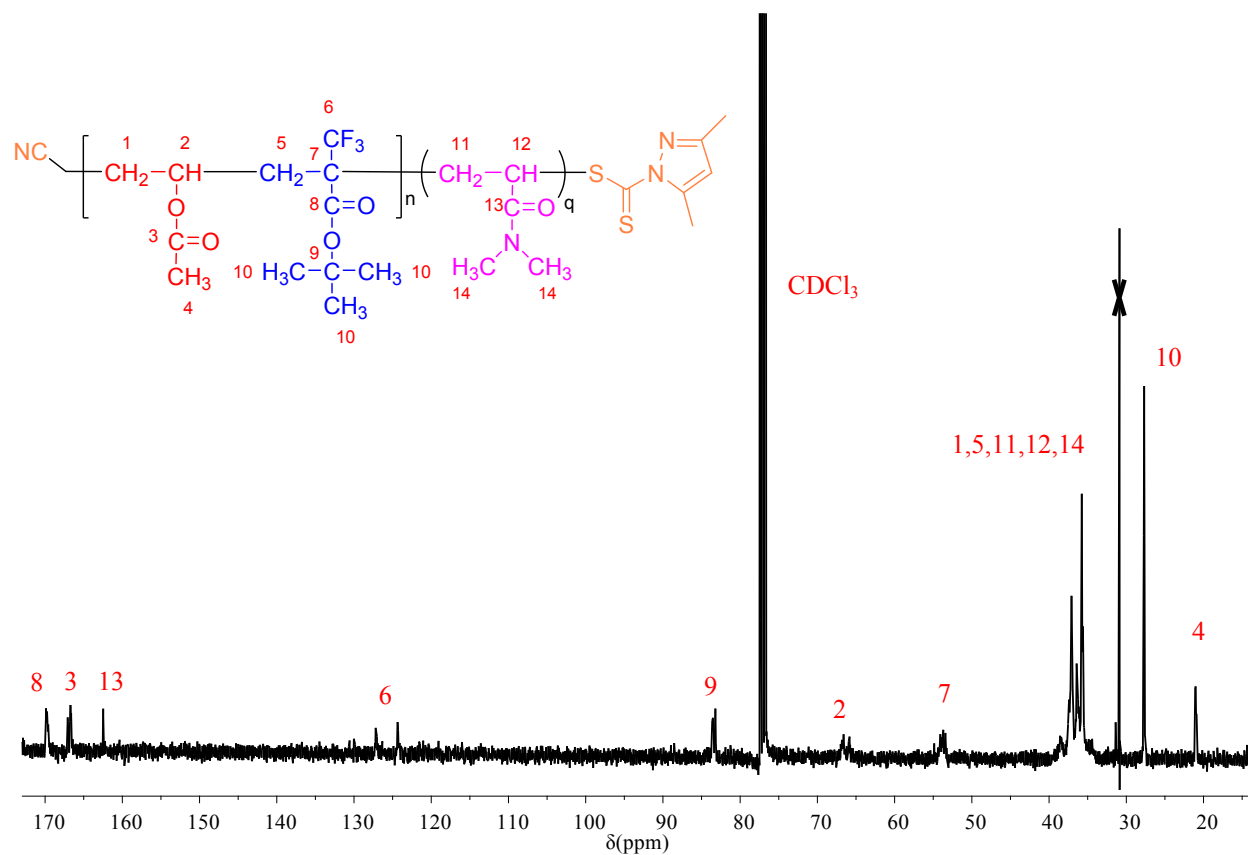

**Figure S3.**  $^{13}\text{C}$  NMR spectrum ( $\text{CDCl}_3$ ) of P(VAc-*alt*-MAF-TBE)-*b*-PDMA-1 diblock terpolymer. The crossed-out signals are those of acetone (30.92 ppm)

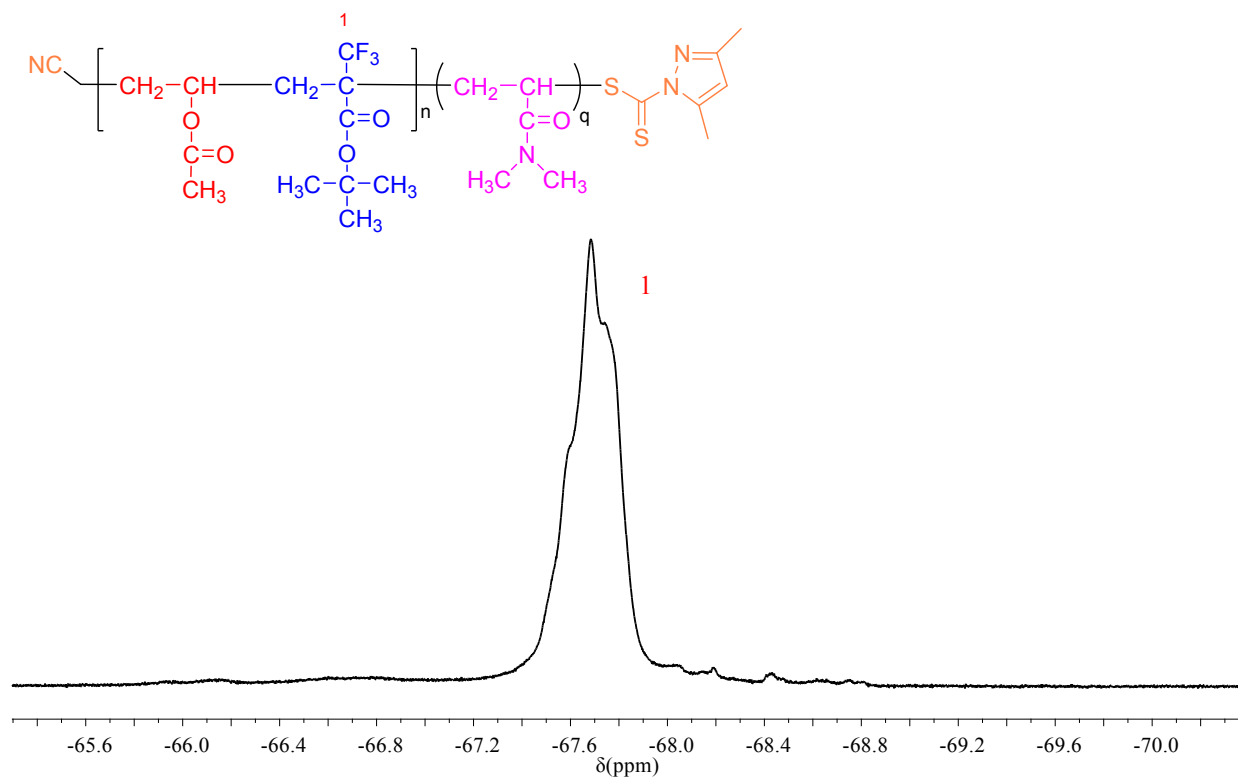

**Figure S4.**  $^{19}\text{F}$  NMR spectrum ( $\text{CDCl}_3$ ) of P(VAc-*alt*-MAF-TBE)-*b*-PDMA-1 diblock terpolymer.

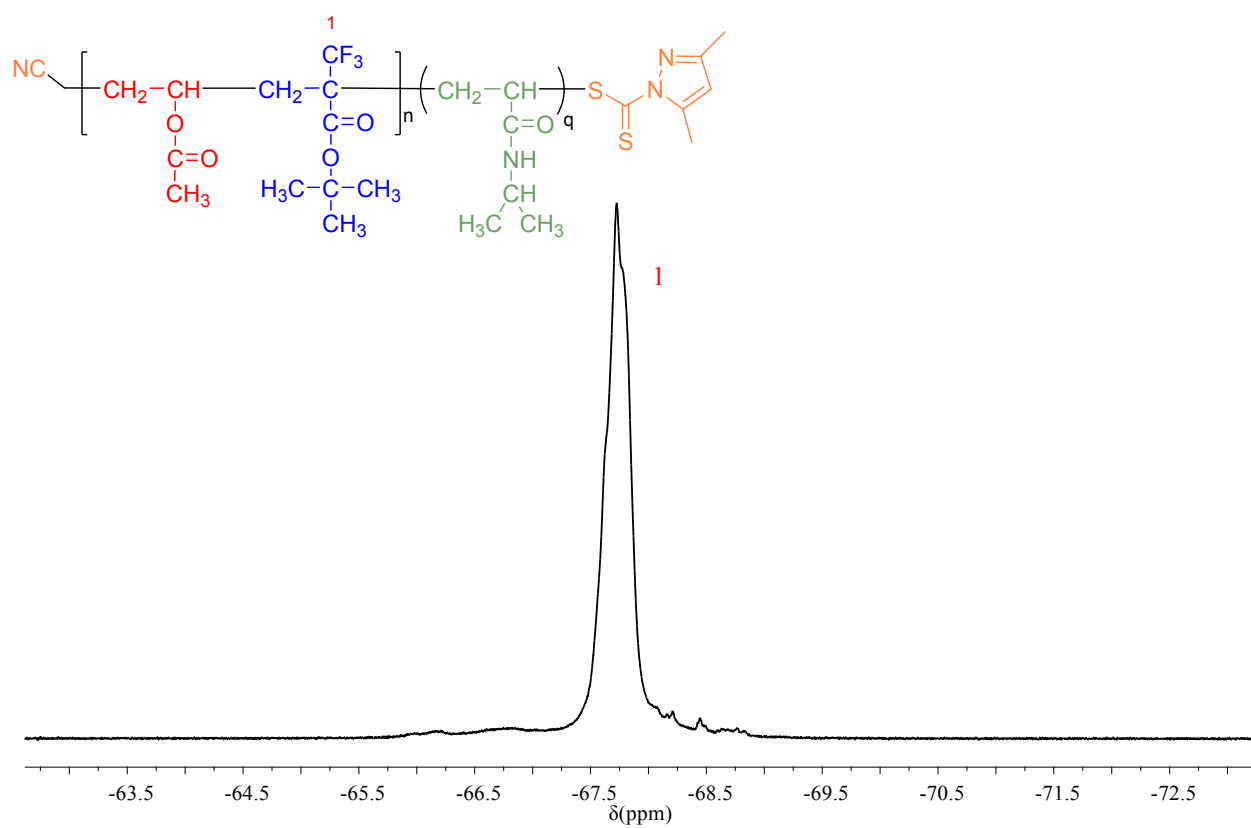

**Figure S5.**  $^{19}\text{F}$  NMR spectrum ( $\text{CDCl}_3$ ) of P(VAc-*alt*-MAF-TBE)-*b*-PNIPAM-1 diblock terpolymer.

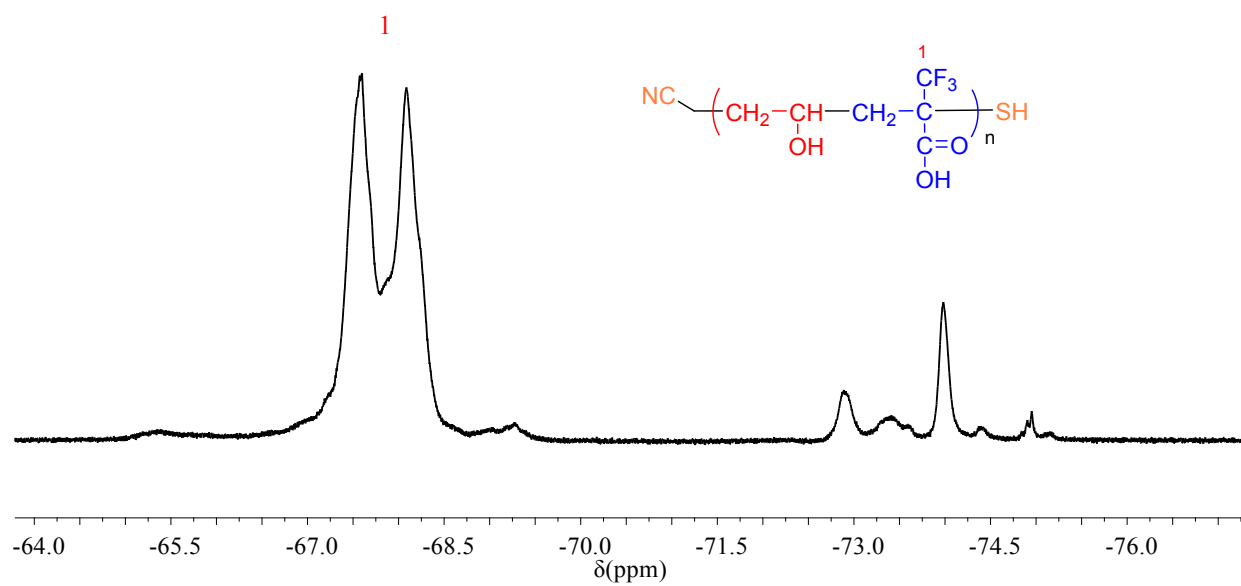

**Figure S6.**  $^{19}\text{F}$  NMR spectrum ( $\text{D}_2\text{O}$ ) of P(VOH-*alt*-MAF) copolymer.

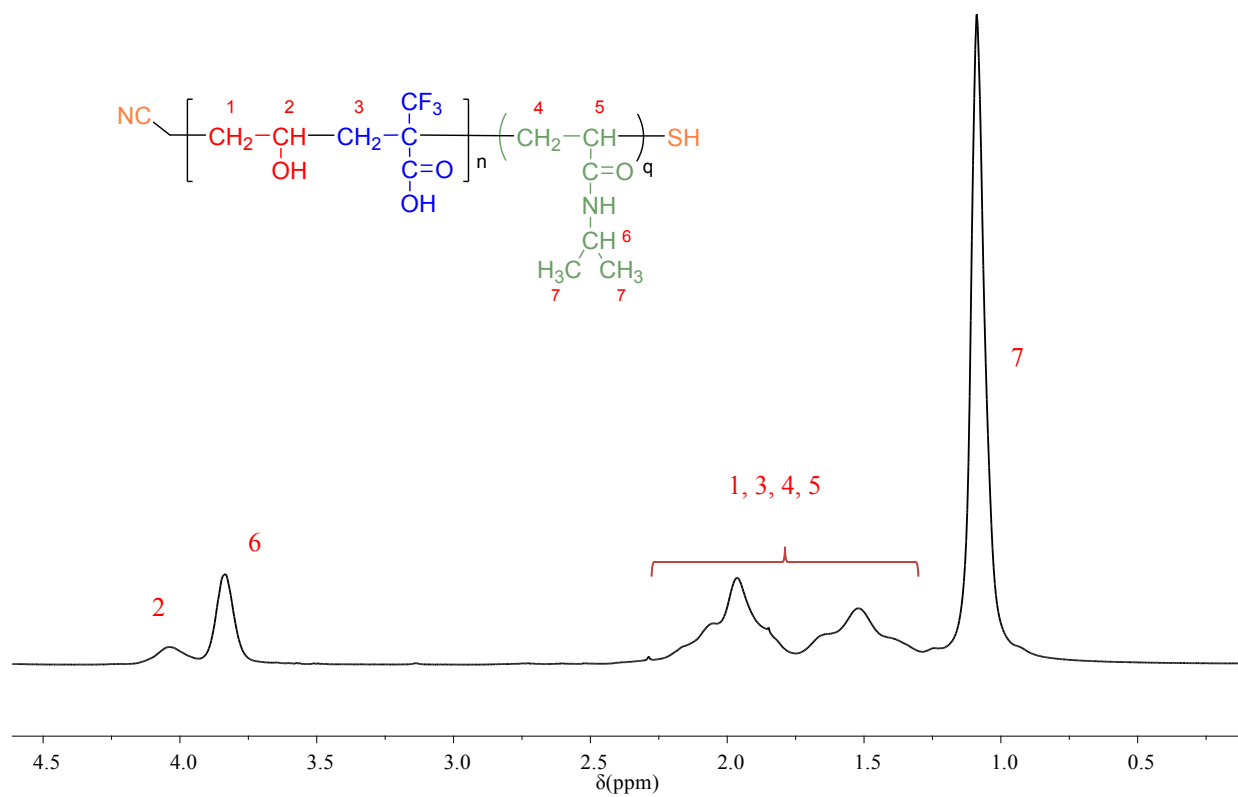

**Figure S7.** <sup>1</sup>H NMR spectrum (D<sub>2</sub>O) of P(VOH-*alt*-MAF)-*b*-PNIPAM-1 block terpolymer.



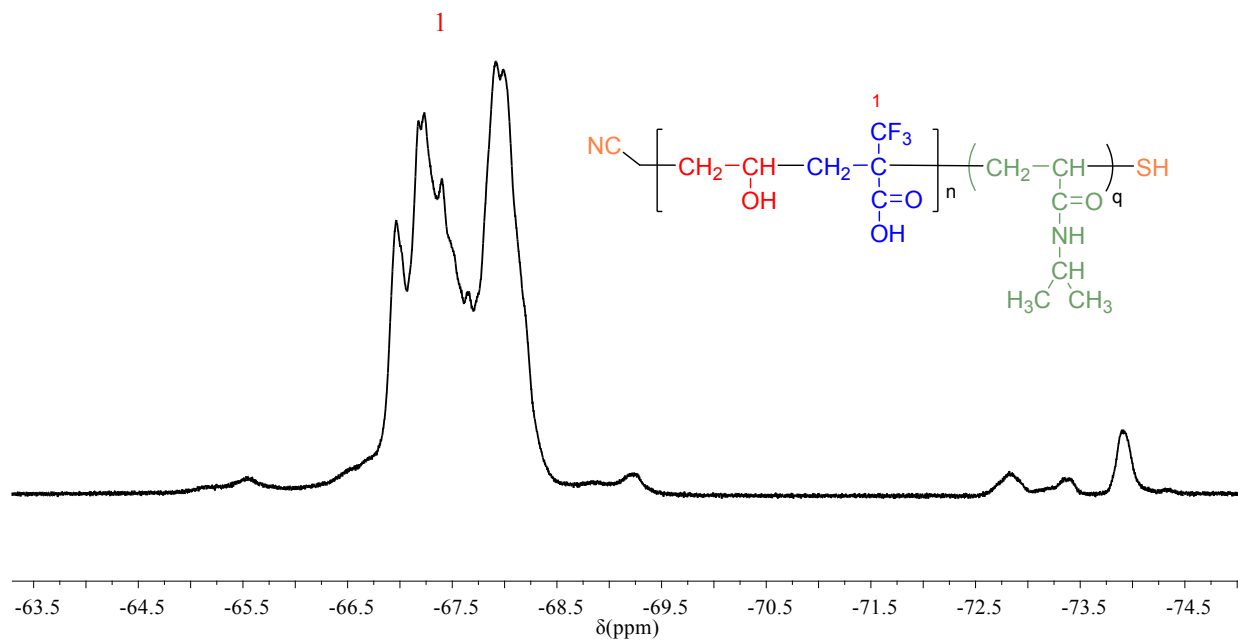

**Figure S8.**  $^{19}\text{F}$  NMR spectrum ( $\text{D}_2\text{O}$ ) of P(VOH-*alt*-MAF)-*b*-PNIPAM-1 block terpolymer.

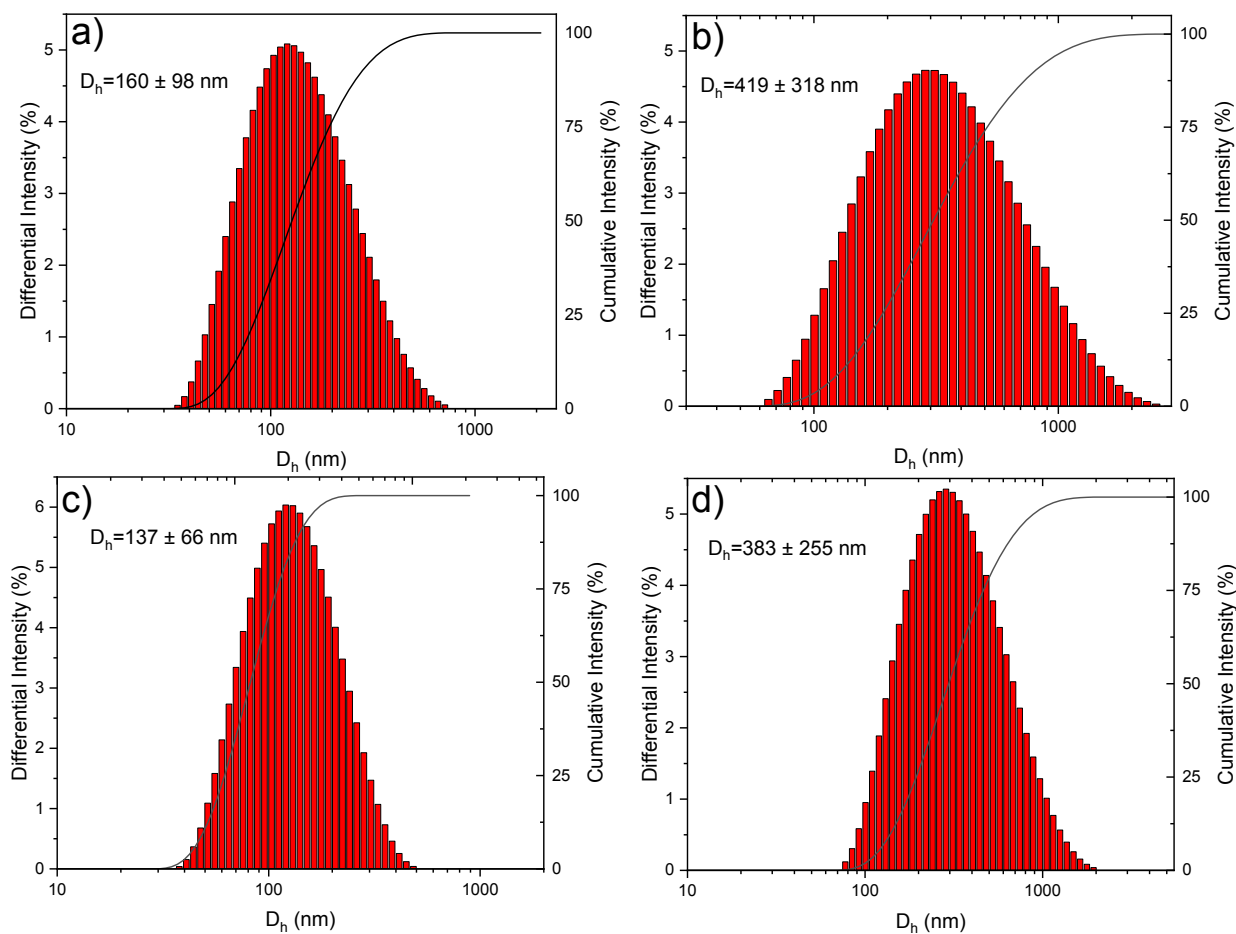

**Figure S9.** Particle size distribution of self-assembled P(VAc-*alt*-MAF-TBE)-*b*-PDMA-1 and P(VAc-*alt*-MAF-TBE)-*b*-PDMA-2 diblock terpolymers (a and b, respectively), and P(VAc-*alt*-MAF-TBE)-*b*-PNIPAM-1 and P(VAc-*alt*-MAF-TBE)-*b*-PNIPAM-2 diblock terpolymers (c and d, respectively) at pH=7.0 and 25 °C.

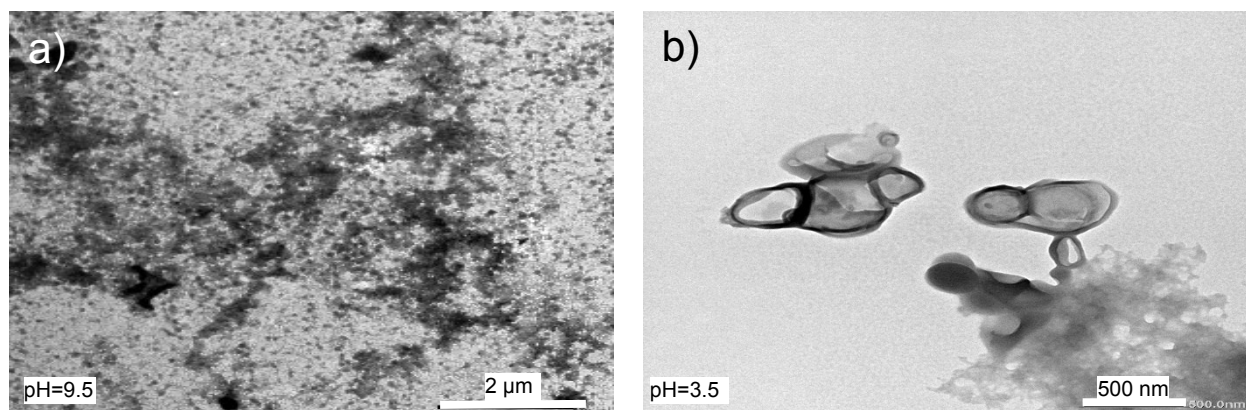

**Figure S10.** TEM micrographs of self-assembled P(VOH-*alt*-MAF)-*b*-PNIPAM-2 at pH=9.5 (a) pH=3.5 (b).
